# Supplementary material
Source: PubMed Central journal article supplement (PMC4318856)
Supplement: NIHMS594092-supplement-01.pdf [file NIHMS594092-supplement-01.pdf]

Supplementary Material to, 'A Bayesian Mixed Treatment Comparisons Meta-Analysis of Treatments for Alcohol Dependence and Implications for Planning Future Trials'

| Publication      | Placebo |       | NAL    |       | ACA    |       | ACA+NAL |       |
|------------------|---------|-------|--------|-------|--------|-------|---------|-------|
|                  | Events  | Total | Events | Total | Events | Total | Events  | Total |
| Kiefer 2003      | 37      | 40    | 26     | 40    | 30     | 40    | 18      | 40    |
| Anton 2006       | 254     | 309   | 241    | 309   | 244    | 303   | 241     | 305   |
| Morley 2006      | 50      | 61    | 44     | 53    | 44     | 55    |         |       |
| Anton 1999       | 42      | 63    | 36     | 68    |        |       |         |       |
| Chick 2000a      | 69      | 85    | 74     | 90    |        |       |         |       |
| Gastpar 2002     | 45      | 87    | 41     | 84    |        |       |         |       |
| Haung 2002       | 15      | 22    | 5      | 23    |        |       |         |       |
| Kranzler 2000    | 41      | 63    | 43     | 61    |        |       |         |       |
| Lee 2001         | 11      | 18    | 19     | 35    |        |       |         |       |
| O'Malley 1992    | 42      | 52    | 30     | 52    |        |       |         |       |
| Oslin 1997       | 8       | 23    | 6      | 21    |        |       |         |       |
| Volpicelli 1992  | 20      | 35    | 16     | 35    |        |       |         |       |
| Volpicelli 1997  | 32      | 49    | 27     | 48    |        |       |         |       |
| Chick 2000b      | 260     | 292   |        |       | 254    | 289   |         |       |
| Baltieri 2003    | 21      | 35    |        |       | 15     | 40    |         |       |
| Barrias 1997     | 121     | 152   |        |       | 98     | 150   |         |       |
| Besson 1998      | 52      | 55    |        |       | 41     | 55    |         |       |
| Borg 2003        | 3       | 5     |        |       | 3      | 5     |         |       |
| Geerlings 1997   | 121     | 134   |        |       | 103    | 128   |         |       |
| Gual 2001        | 109     | 147   |        |       | 92     | 141   |         |       |
| Ladewig 1993     | 25      | 32    |        |       | 17     | 29    |         |       |
| Lhuintre 1985    | 31      | 43    |        |       | 22     | 42    |         |       |
| Lhuintre 1990    | 245     | 291   |        |       | 208    | 279   |         |       |
| Mason 2006       | 240     | 260   |        |       | 328    | 341   |         |       |
| Namkoong 2003    | 48      | 70    |        |       | 45     | 72    |         |       |
| Niederhofer 2002 | 11      | 13    |        |       | 6      | 13    |         |       |
| Paille 1995      | 161     | 177   |        |       | 294    | 361   |         |       |
| Pelc 1992        | 45      | 47    |        |       | 42     | 55    |         |       |
| Pelc 1997        | 53      | 62    |        |       | 74     | 126   |         |       |
| Poldrugo 1997    | 92      | 124   |        |       | 66     | 122   |         |       |
| Rousseaux 1996   | 43      | 64    |        |       | 45     | 63    |         |       |
| Sass 1996        | 102     | 136   |        |       | 75     | 136   |         |       |
| Tempesta 2000    | 115     | 166   |        |       | 87     | 164   |         |       |
| Whitworth 1996   | 208     | 224   |        |       | 183    | 224   |         |       |

Supplementary Table 1. The MTC data structure for the outcome return to drinking.  
ACA=acamprostate, NAL= naltrexone, ACA+NAL = combined therapy.
